# Supplementary material for: Niche differentiation of ammonia and nitrite oxidizers along a salinity gradient from the Pearl River estuary to the South China Sea
Source: Copernicus journal article supplement (doi:10.5194/bg-2018-189), 2018-05-09
Supplement: Supplementary file 1 [file bg-2018-189-supplement.pdf]

**Table S1.** Abundances of the archaeal and  $\beta$ -proteobacterial *amoA* genes and *Nitrospira* and *Nitrospina* 16S rRNA genes in the PRE.

| Station | Water Depth (m) | Sampling Depth (m) | Archaeal <i>amoA</i><br>(copies L <sup>-1</sup> ) |      |                 |       | $\beta$ -proteobacterial <i>amoA</i><br>(copies L <sup>-1</sup> ) |     |                 |                 | <i>Nitrospira</i> 16S rRNA<br>(copies L <sup>-1</sup> ) |      |                 |                 | <i>Nitrospina</i> 16S rRNA<br>(copies L <sup>-1</sup> ) |      |                 |                 |
|---------|-----------------|--------------------|---------------------------------------------------|------|-----------------|-------|-------------------------------------------------------------------|-----|-----------------|-----------------|---------------------------------------------------------|------|-----------------|-----------------|---------------------------------------------------------|------|-----------------|-----------------|
|         |                 |                    | FL <sup>a</sup>                                   | SD   | PA <sup>b</sup> | SD    | FL <sup>a</sup>                                                   | SD  | PA <sup>b</sup> | SD              | FL <sup>a</sup>                                         | SD   | PA <sup>b</sup> | SD              | FL <sup>a</sup>                                         | SD   | PA <sup>b</sup> | SD              |
| P1      | 8.9             | 1                  | 0                                                 |      | 1501            | 40    | 0                                                                 |     | 1338            | 799             | 1533                                                    | 446  | 33025           | 525             | 909                                                     | 747  | 4537            | 691             |
|         |                 | 7                  | 0                                                 |      | 1248            | 57    | 228                                                               | 56  | 528             | 17              | 776                                                     | 76   | 53287           | 1086            | 121                                                     | 6    | 3902            | 179             |
| P2      | 9.8             | 1                  |                                                   |      | NS <sup>c</sup> |       |                                                                   |     | NS <sup>c</sup> |                 |                                                         |      | NS <sup>c</sup> |                 |                                                         |      | NS <sup>c</sup> |                 |
|         |                 | 7                  | 2768                                              | 27   | 4462            | 1243  | 526                                                               | 6   | 7441            | 562             | 29374                                                   | 5945 | 328697          | 15430           | 4851                                                    | 447  | 45997           | 2792            |
| P3      | 10.2            | 1                  |                                                   |      | NS <sup>c</sup> |       |                                                                   |     | NS <sup>c</sup> |                 |                                                         |      | NS <sup>c</sup> |                 |                                                         |      | NS <sup>c</sup> |                 |
|         |                 | 8                  | 2556                                              | 251  | 11321           | 85    | 298                                                               | 14  | 8239            | 482             | 25360                                                   | 1478 | 573425          | 12573           | 5103                                                    | 850  | 85027           | 9576            |
| P4      | 21.5            | 1                  |                                                   |      | NS <sup>c</sup> |       |                                                                   |     | NS <sup>c</sup> |                 |                                                         |      | NS <sup>c</sup> |                 |                                                         |      | NS <sup>c</sup> |                 |
|         |                 | 18                 | 657                                               | 22   | 12080           | 516   | 308                                                               | 49  | 34158           | 2469            | 9175                                                    | 1541 | 2024263         | 198739          | 3068                                                    | 441  | 380537          | 14232           |
| P5      | 22.5            | 1                  | 4104                                              | 80   | 6535            | 30    | 961                                                               | 58  | 5532            | 428             | 40070                                                   | 3306 | 365741          | 18556           | 13556                                                   | 1852 | 84860           | 3967            |
|         |                 | 19                 | 3263                                              | 109  | 9162            | 327   | 672                                                               | 70  | 12341           | 292             | 38076                                                   | 5273 | 763345          | 93318           | 12186                                                   | 1715 | 125427          | 10142           |
| P6      | 18.8            | 1                  | 3617                                              | 305  | 11219           | 241   | 488                                                               | 71  | 4136            | 208             | 21516                                                   | 2437 | 482519          | 13994           | 3763                                                    | 250  | 56974           | 2244            |
|         |                 | 16                 |                                                   |      | NS <sup>c</sup> |       |                                                                   |     |                 | NS <sup>c</sup> |                                                         |      |                 | NS <sup>c</sup> |                                                         |      |                 | NS <sup>c</sup> |
| P7      | 12              | 1                  | 40742                                             | 2180 | 108877          | 4425  | 2012                                                              | 245 | 14259           | 3443            | 69806                                                   | 5991 | 735150          | 42882           | 7820                                                    | 652  | 95572           | 4870            |
|         |                 | 10                 | 10212                                             | 2234 | 8267            | 677   | 221                                                               | 11  | 974             | 171             | 11393                                                   | 3342 | 46220           | 3334            | 950                                                     | 103  | 7540            | 399             |
| P8      | 5               | 1                  | 2614                                              | 47   | 64350           | 3095  | 150                                                               | 40  | 1024            | 72              | 16111                                                   | 1427 | 70874           | 15050           | 3368                                                    | 539  | 7479            | 625             |
|         |                 | 3.5                | 2904                                              | 272  | 49549           | 4515  | 201                                                               | 117 | 1228            | 92              | 26179                                                   | 3334 | 83656           | 10345           | 5913                                                    | 668  | 11065           | 1838            |
| P9      | 8               | 1                  | 1018                                              | 55   | 23925           | 1716  | 70                                                                |     | 553             | 127             | 3536                                                    | 475  | 40278           | 3435            | 8309                                                    | 1501 | 75342           | 10147           |
|         |                 | 6                  | 501                                               | 22   | 454359          | 16727 | 0                                                                 |     | 1392            | 64              | 0                                                       |      | 47889           | 10565           | 769                                                     | 139  | 296757          | 20048           |
| P10     | 12.9            | 1                  | 1114                                              | 28   | 730             | 231   | 0                                                                 |     | 121             |                 | 506                                                     | 128  | 1663            | 946             | 1814                                                    | 98   | 2033            | 214             |
|         |                 | 11                 | 3683                                              | 160  | 9475            | 1631  | 298                                                               | 71  | 165             | 29              | 63                                                      | 23   | 973             | 292             | 2340                                                    | 256  | 14241           | 2378            |
| P11     | 14.2            | 1                  | 0                                                 |      | 0               |       | 0                                                                 |     | 172             | 118             | 43                                                      |      | 495             | 135             | 412                                                     | 151  | 51              |                 |

|     |    |    |       |      |       |      |   |      |    |     |     |      |     |      |      |       |      |
|-----|----|----|-------|------|-------|------|---|------|----|-----|-----|------|-----|------|------|-------|------|
|     |    | 12 | 4710  | 435  | 18304 | 1145 | 0 | 224  | 14 | 154 | 101 | 2542 | 750 | 3400 | 315  | 12913 | 2894 |
| P12 | 16 | 1  | 714   | 52   | 0     |      | 0 | 0    |    | 68  |     | 0    |     | 6945 | 3360 | 362   |      |
|     |    | 14 | 21793 | 1731 | 33005 | 3976 | 0 | 1423 | 74 | 227 | 110 | 5294 | 807 | 6635 | 851  | 20858 | 530  |

1 <sup>a</sup>, Free-living; <sup>b</sup>, Particle-associated; <sup>c</sup>, No sample

1

**Table S2.** Primer set sequences, PCR reaction mixtures and conditions for each gene.

| Target gene                                       | Primer     | Sequence (5'-3')         | PCR mixture                                                                                                                                                                                             | PCR conditions                                                                                    | References                            |
|---------------------------------------------------|------------|--------------------------|---------------------------------------------------------------------------------------------------------------------------------------------------------------------------------------------------------|---------------------------------------------------------------------------------------------------|---------------------------------------|
| <i>β</i> -proteobacterial<br><i>amoA</i>          | amoA-34F   | GCGGCRAAAATGCCGCCGGAAGCG | 50 μL reaction mixture: Failsafe Premix F (Epicentre Biotechnologies, Madison, WI, U.S.A.) 25 μL, primers 0.5 μM, plantium Taq DNA polymerase (Invitrogen, Carlsbad, CA, U.S.A.) 1 U, DNA template 1 μL | 95 °C for 2 min; hot start at 80 °C; and 25 x (95 °C for 30 s, 57 °C for 30 s, 73 °C for 3 min).  | Kim et al., 2008; Hu et al., 2010     |
|                                                   | amoA-2R    | CCCCTCKGSAAAGCCTTCTTC    |                                                                                                                                                                                                         |                                                                                                   |                                       |
| Archaeal <i>amoA</i>                              | Arch-amoAF | STAATGGTCTGGCTTAGACG     | 50 μL reaction mixture: Failsafe Premix F (Epicentre Biotechnologies) 25 μL, primers 0.5 μM, plantium Taq DNA polymerase (Invitrogen) 1 U, DNA template 1 μL                                            | 95 °C for 5 min; 30 x (94 °C for 45 s, 53 °C for 60 s, and 72 °C for 60 s); and 72 °C for 15 min. | Francis et al., 2005; Hu et al., 2010 |
|                                                   | Arch-amoAR | GCGGCCATCCATCTGTATGT     |                                                                                                                                                                                                         |                                                                                                   |                                       |
| <i>Nitrobacter</i> and<br><i>Nitrococcus nxrB</i> | nxBF706    | AAGACCTAYTTCAACTGGTC     | 50 μL reaction mixture: Ex Taq DNA polymerase 0.25 μL (TaKaRa), 10×Buffer 5 μL, dNTP 4 μL, Mg <sup>2+</sup> 4 μL, primers 1 μM, BSA (20 μg/μL) 0.125 μL, DNA template 2 μL                              | 95 °C for 5 min; 35 x (95 °C for 40 s, 56 °C 30 s, 72 °C 30 s), 72 °C for 10 min.                 | Koch, 2009                            |
|                                                   | nxBR1431   | CGCTCCATCGGYGGAACMAC     |                                                                                                                                                                                                         |                                                                                                   |                                       |
| <i>Nitrospira nxrB</i>                            | nxB169F    | TACATGTGGTGGAACA         | 25 μL reaction mixture: Platinum Taq DNA polymerase 0.1 μL (Invitrogen), 10×Buffer 2.5 μL, dNTP 2 μL, Mg <sup>2+</sup> 4 μL, primers 1 μM, BSA (200 ng/μL) 2.5 μL, DNA template 1 μL                    | 95 °C for 5 min; 35 x (95 °C for 40 s, 56.2 °C 40 s, 72 °C 90 s), 72 °C for 10 min.               | Modified from Pester et al., 2013     |
|                                                   | nxB638R    | CGGTTCTGGTCRATCA         |                                                                                                                                                                                                         |                                                                                                   |                                       |
| <i>Nitrospina nxrB</i>                            | nxBNF      | GGGCGACCAGATGGAAAC       | 25 μL reaction mixture: LA Taq DNA polymerase 0.25 μL (TaKaRa), 10×Buffer 2.5 μL, dNTP 1 μL, Mg <sup>2+</sup> 5 μL, primers 1 μM, BSA (200 ng/μL) 2.5 μL, DNA template 1 μL                             | 95 °C for 5 min; 35 x (95 °C for 40 s, 56.2 °C 40 s, 72 °C 90 s), 72 °C for 10 min.               | This study                            |
|                                                   | nxBNR      | GGGCCGGACATAGAAAGG       |                                                                                                                                                                                                         |                                                                                                   |                                       |

2

3

1 **References**

2 Francis, C. A., Roberts, K. J., Beman, J. M., Santoro, A. E., and Oakley, B. B.:  
3 Ubiquity and diversity of ammonia-oxidizing archaea in water columns and  
4 sediments of the ocean, *P. Natl. Acad. Sci. USA*, 102, 14683–14688, 2005.

5 Hu, A., Yao, T., Jiao, N., Liu, Y., Yang, Z., and Liu, X.: Community structures of  
6 ammonia-oxidizing archaea and bacteria in high-altitude lakes on the Tibetan  
7 Plateau, *Freshw. Biol.*, 55, 2375–2390, 2010.

8 Kim, O. S., Junier, P., Imhoff, J. F., and Witzel, K. P.: Comparative analysis of  
9 ammonia monooxygenase (*amoA*) genes in the water column and sediment–water  
10 interface of two lakes and the Baltic Sea, *FEMS Microbiol. Ecol.*, 66, 367–378,  
11 2008.

12 Koch H.: Ecophysiological investigation of nitrite-oxidizing bacteria of the genus  
13 *Nitrospira*, Ph.D. thesis, University of Vienna, Austria, 123pp., 2009.

14 Pester, M., Maixner, F., Berry, D., Rattei, T., Koch, H. and Lückner, S.: *NxrB* encoding  
15 the beta subunit of nitrite oxidoreductase as functional and phylogenetic marker for  
16 nitrite-oxidizing *Nitrospira*, *Environ. Microbiol.*, 16, 3055–3071, 2013.

17

1

**Table S3.** Primer pair sequences, qPCR mixtures and conditions for each gene.

| Target gene                              | Primer      | Sequence (5'-3')        | PCR mixture                                                                                                               | PCR conditions                                                                            | Efficiency | References                                                   |
|------------------------------------------|-------------|-------------------------|---------------------------------------------------------------------------------------------------------------------------|-------------------------------------------------------------------------------------------|------------|--------------------------------------------------------------|
| <i>β</i> -proteobacterial<br><i>amoA</i> | amoA-1F     | GGGGHTTYTACTGGTGGT      | 25 μL reaction mixture: SYBR® Premix Ex Taq™ (TakaRa, Dalian, China) 12.5 μL, BSA 5 μg, primers 0.4 μM, DNA template 1 μL | 94 °C for 30 s; 45 × (94 °C for 15 s, 60 °C for 60 s, and 72 °C for 90 s).                | 96-104 %   | Rotthauwe et al., 1997; Hu et al., 2011; Mincer et al., 2007 |
|                                          | amoA-2R     | CCCCTCKGSAAAGCCTTCTTC   |                                                                                                                           |                                                                                           |            |                                                              |
| Archaeal <i>amoA</i>                     | Arch-amoAF  | STAATGGTCTGGCTTAGACG    | 25 μL reaction mixture: SYBR® Premix Ex Taq™ (TakaRa) 12.5 μL, BSA 5 μg, primers 0.4 μM, DNA template 1 μL                | 95 °C for 30 s; 40 × (95 °C for 30 s, 53 °C for 60 s, and 72 °C for 45 s).                | 91-98%     | Francis et al., 2005; Hu et al., 2011                        |
|                                          | Arch-amoAR  | GCGGCCATCCATCTGTATGT    |                                                                                                                           |                                                                                           |            |                                                              |
| <i>Nitrospira</i> 16S<br>rRNA            | Nspra-675f  | GCGGTGAAATGCGTAGAKATCG  | 25 μL reaction mixture: SYBR® Premix Ex Taq™ (TakaRa) 12.5μL, BSA 15 μg, primers 0.2 μM, DNA template 1 μL                | 95 °C for 10 min; 45 × (94 °C for 30 s, 64 °C for 30 s, 72 °C for 60 s).                  | 92-98 %    | Graham et al., 2007; Attard et al., 2010                     |
|                                          | Nspra-746r  | TCAGCGTCAGRWAYGTTCCAGAG |                                                                                                                           |                                                                                           |            |                                                              |
| <i>Nitrospina</i> 16S<br>rRNA            | NitSSU_130F | GGGTGAGTAACACGTGAATAA   | 25 μL reaction mixture: SYBR® Premix Ex Taq™ (TakaRa) 12.5μL, BSA 1 μg, primers 0.4 μM, DNA template 1 μL                 | 94 °C for 15 min; 45 × (94 °C for 15 s, 57.5 °C for 15 s, 72 °C for 30 s, 77 °C for 1 s). | 90-100 %   | Mincer et al., 2007                                          |
|                                          | NitSSU_282R | TCAGGCCGGCTAAMCA        |                                                                                                                           |                                                                                           |            |                                                              |

2

3

1 **References**

2 Attard, E., Poly, F., Commeaux, C., Laurent, F., Terada, A., Smets, B. F., Recous, S.,  
3 Le Roux, X.: Shifts between *Nitrospira*- and *Nitrobacter*-like nitrite oxidizers  
4 underlie the response of soil potential nitrite oxidation to changes in tillage  
5 practices, *Environ. Microbiol.*, 12, 315–326, 2010.

6 Graham, D. W., Knapp, C. W., Van Vleck, E. S., Bloor, K., Lane, T. B., and Graham,  
7 C. E.: Experimental demonstration of chaotic instability in biological nitrification,  
8 *ISME J.*, 1, 1–9, 2007.

9 Hu, A., Jiao, N., and Zhang, C.: Community structure and function of planktonic  
10 Crenarchaeota: changes with depth in the South China Sea, *Microb. Ecol.*, 62,  
11 549–563, 2011.

12 Mincer, T. J., Church, M. J., Taylor, L. T., Preston, C., Karl, D. M., and DeLong, E. F.:  
13 Quantitative distribution of presumptive archaeal and bacterial nitrifiers in  
14 Monterey Bay and the North Pacific Subtropical Gyre, *Environ. Microbiol.*, 9,  
15 1162–1175, 2007.

16 Rotthauwe, J. H., Witzel, K. P., and Liesack, W.: The ammonia monooxygenase  
17 structural gene *amoA* as a functional marker: molecular fine-scale analysis of  
18 natural ammonia-oxidizing populations, *Appl. Environ. Microbiol.*, 63, 4704–4712,  
19 1997.

20

1 **Table S4.** Diversity indices of AOA and  $\beta$ -AOB *amoA*, *Nitrospira*, *Nitrospina*, and  
 2 *Nitrobacter nxrB* genes based on 5% nucleic acid sequences cutoff.

| Genes                          | n   | No. of OTUs | C (%) | H'   | 1/D   | Chao1 |
|--------------------------------|-----|-------------|-------|------|-------|-------|
| AOA <i>amoA</i> (SCS)          | 392 | 60          | 0.94  | 3.04 | 10.64 | 49.46 |
| AOA <i>amoA</i> (PRE)          | 127 | 23          | 0.90  | 2.13 | 4.87  | 42.5  |
| $\beta$ -AOB <i>amoA</i> (PRE) | 26  | 3           | 0.96  | 0.43 | 1.28  | 3     |
| <i>Nitrospira nxrB</i>         | 345 | 29          | 0.96  | 1.79 | 3.57  | 42    |
| <i>Nitrospina nxrB</i>         | 185 | 12          | 0.98  | 1.79 | 4.83  | 12.75 |
| <i>Nitrobacter nxrB</i>        | 48  | 3           | 0.98  | 0.78 | 2.13  | 3     |

3 n, number of sequences; OTU, operational taxonomic unit; C, coverage; H',  
 4 Shannon-Wiener Index; 1/D, Simpson's diversity Index; SCS, South China Sea; PRE,  
 5 Pearl River estuary

1

**Table S5.** *r* values for the relationship between gene abundances of nitrifiers and environmental parameters in the PRE.

| Gene                          | Community       | Water mass parameters   |                      |                                            | Substrate parameters                     |                                          |                                          | Parameters influencing substrate availability |                |                |
|-------------------------------|-----------------|-------------------------|----------------------|--------------------------------------------|------------------------------------------|------------------------------------------|------------------------------------------|-----------------------------------------------|----------------|----------------|
|                               |                 | Temperature<br>(n = 20) | Salinity<br>(n = 20) | SiO <sub>3</sub> <sup>2-</sup><br>(n = 20) | NH <sub>4</sub> <sup>+</sup><br>(n = 15) | NO <sub>2</sub> <sup>-</sup><br>(n = 20) | NO <sub>3</sub> <sup>-</sup><br>(n = 20) | TSM<br>(n = 19)                               | DO<br>(n = 20) | pH<br>(n = 20) |
| AOB<br><i>amoA</i>            | FL <sup>a</sup> | 0.302                   | -0.441               | 0.439                                      | -0.108                                   | 0.527*                                   | 0.759**                                  | -0.053                                        | -0.425         | -0.512*        |
|                               | PA <sup>b</sup> | 0.332                   | -0.474*              | 0.475*                                     | -0.048                                   | 0.706**                                  | 0.464*                                   | 0.520*                                        | -0.525*        | -0.496*        |
|                               | FL+PA           | 0.341                   | -0.471*              | 0.487*                                     | -0.053                                   | 0.718**                                  | 0.491*                                   | 0.504*                                        | -0.536*        | -0.513*        |
| AOA<br><i>amoA</i>            | FL <sup>a</sup> | -0.158                  | 0.016                | -0.051                                     | -0.208                                   | 0.005                                    | 0.013                                    | -0.125                                        | 0.024          | -0.050         |
|                               | PA <sup>b</sup> | -0.213                  | 0.239                | -0.223                                     | -0.341                                   | -0.186                                   | -0.144                                   | 0.562*                                        | 0.209          | 0.191          |
|                               | FL+PA           | -0.226                  | 0.238                | -0.225                                     | -0.321                                   | -0.184                                   | -0.142                                   | 0.543*                                        | 0.208          | 0.184          |
| <i>Nitrospira</i><br>16S rRNA | FL <sup>a</sup> | 0.426                   | -0.580**             | 0.537*                                     | -0.205                                   | 0.643**                                  | 0.772**                                  | -0.099                                        | -0.464*        | -0.625**       |
|                               | PA <sup>b</sup> | 0.356                   | -0.474*              | 0.491*                                     | -0.073                                   | 0.730**                                  | 0.518*                                   | 0.504*                                        | -0.541*        | -0.524*        |
|                               | FL+PA           | 0.367                   | -0.475*              | 0.503*                                     | -0.080                                   | 0.743**                                  | 0.539*                                   | 0.493*                                        | -0.550*        | -0.540*        |
| <i>Nitrospina</i><br>16S rRNA | FL <sup>a</sup> | 0.097                   | -0.167               | 0.158                                      | -0.268                                   | 0.436                                    | 0.253                                    | -0.315                                        | -0.190         | -0.230         |
|                               | PA <sup>b</sup> | 0.108                   | -0.134               | 0.162                                      | -0.105                                   | 0.453*                                   | 0.173                                    | 0.822**                                       | -0.276         | -0.221         |
|                               | FL+PA           | 0.111                   | -0.140               | 0.167                                      | -0.115                                   | 0.468*                                   | 0.182                                    | 0.811**                                       | -0.282         | -0.229         |

2 <sup>a</sup>, Free-living; <sup>b</sup>, Particle-associated; \*, *P* < 0.05; \*\*, *P* < 0.01; TSM, Total suspended material; DO, Dissolved oxygen

3



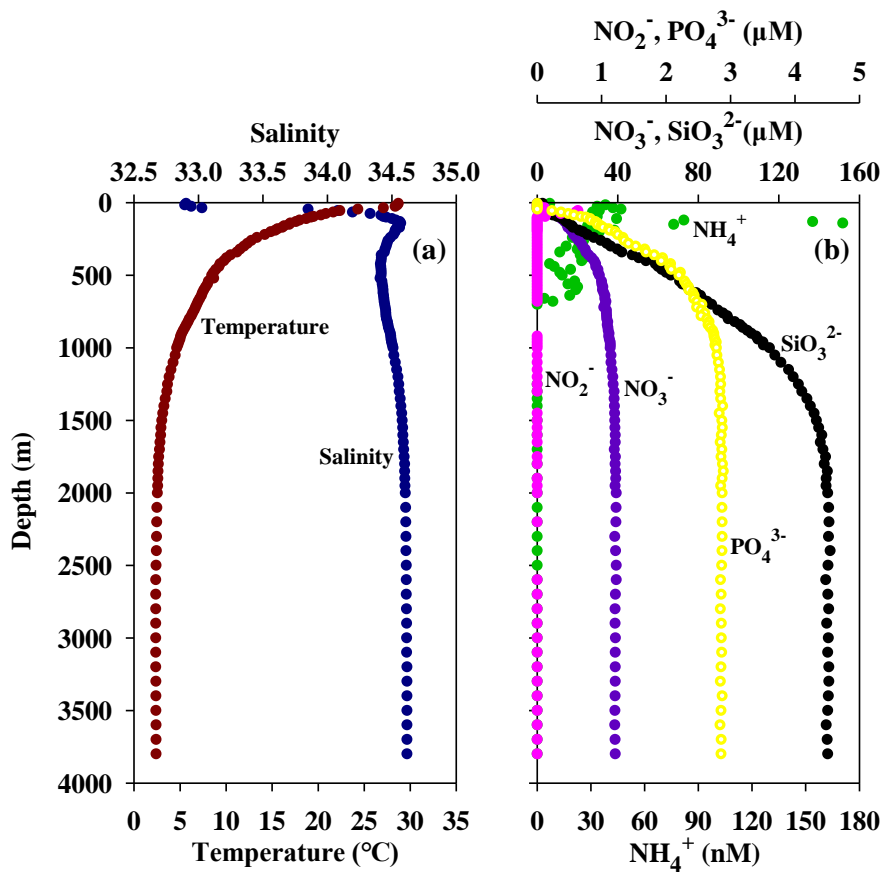

1

2

Figure S1. Depth profiles of biogeochemical parameters at SEATS.

3

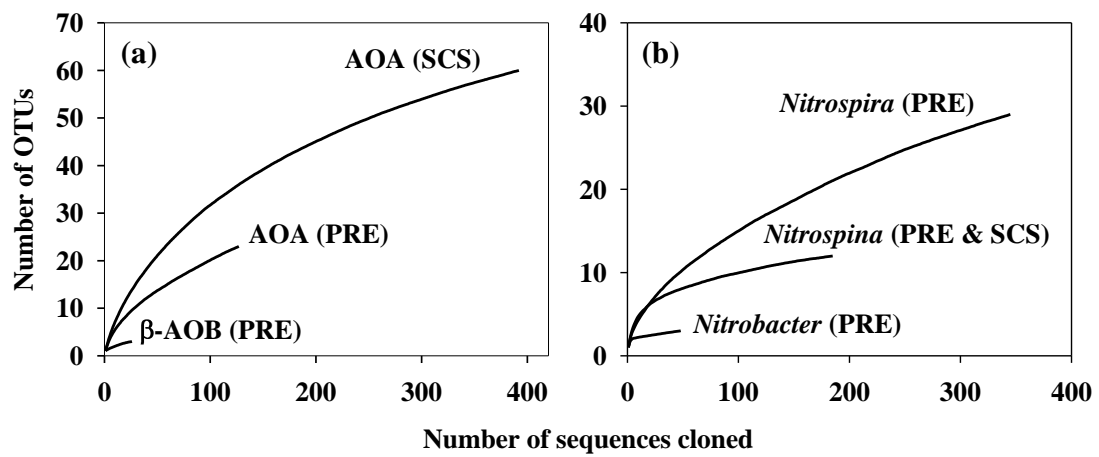

1

2 **Figure S2.** Rarefaction curves of (a) AOA and  $\beta$ -AOB *amoA* gene sequences and (b)

3 *Nitrospira*, *Nitrospina*, and *Nitrobacter nxrB* gene sequences. The curves were

4 generated at 95% DNA sequence identity.

5

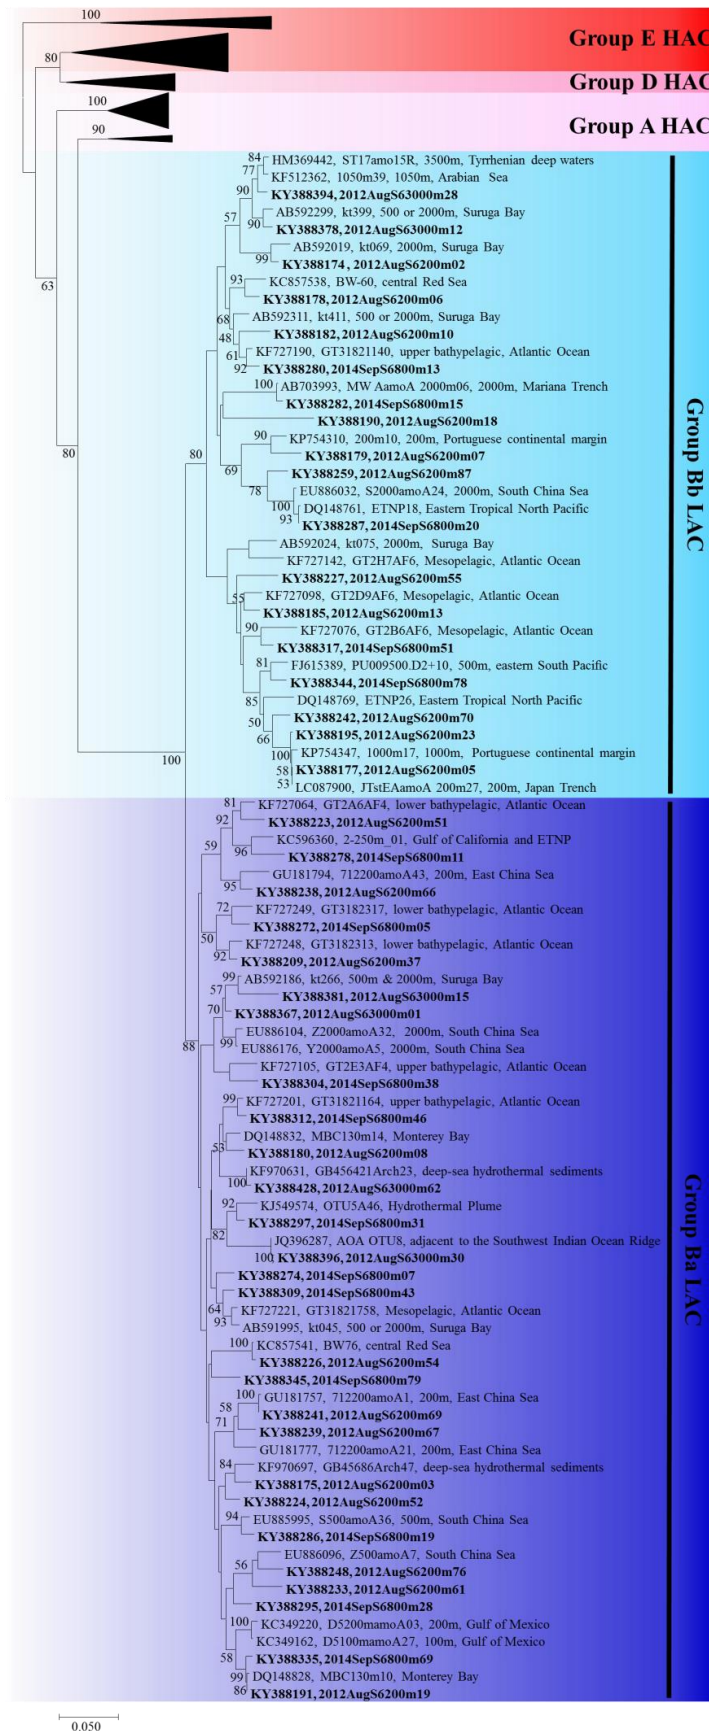

1

2 **Figure S3.** Unrooted neighbor-joining (NJ) phylogenetic tree of the archaeal *amoA*

1 gene sequences (expanded view for group Ba and Bb (LAC)). Clone sequences from  
2 this study are shown in bold and sequences sharing 95% DNA identity are grouped.  
3 Phylogenetic relationships were bootstrapped 1000 times, and bootstrap values greater  
4 than 50% are shown. The scale bar indicates 5% estimated sequence divergence.  
5
