# Supplementary material for: Niche differentiation of ammonia and nitrite oxidizers along a salinity gradient from the Pearl River estuary to the South China Sea
Source: Copernicus journal article supplement (doi:10.5194/bg-2018-189), 2018-05-09
Supplement: Supplementary file [file bg-2018-189-AC1-supplement.pdf]

**Table R1. Archaeal *amoA* gene copies using FranAOA primer set versus WuchterAOA primer set.**

| Station | Water Depth (m) | Sampling Depth (m) | Archaeal <i>amoA</i> (copies L <sup>-1</sup> ) FranAOA |                        |                        |                        | Archaeal <i>amoA</i> (copies L <sup>-1</sup> ) Wuchter AOA |                        |                        |                        |
|---------|-----------------|--------------------|--------------------------------------------------------|------------------------|------------------------|------------------------|------------------------------------------------------------|------------------------|------------------------|------------------------|
|         |                 |                    | FL                                                     | SD                     | PA                     | SD                     | FL                                                         | SD                     | PA                     | SD                     |
| P1      | 8.9             | 1                  | 0                                                      |                        | 1.50 × 10 <sup>3</sup> | 4.00 × 10              | ND                                                         |                        | ND                     |                        |
|         |                 | 7                  | 0                                                      |                        | 1.25 × 10 <sup>3</sup> | 5.72 × 10              | ND                                                         |                        | ND                     |                        |
| P2      | 9.8             | 1                  |                                                        |                        | NS                     |                        |                                                            | NS                     |                        |                        |
|         |                 | 7                  | 2.77 × 10 <sup>3</sup>                                 | 2.69 × 10              | 4.46 × 10 <sup>3</sup> | 1.24 × 10 <sup>3</sup> | ND                                                         |                        | ND                     |                        |
| P3      | 10.2            | 1                  |                                                        |                        | NS                     |                        |                                                            | NS                     |                        |                        |
|         |                 | 8                  | 2.56 × 10 <sup>3</sup>                                 | 2.51 × 10 <sup>2</sup> | 1.13 × 10 <sup>4</sup> | 8.45 × 10              | ND                                                         |                        | ND                     |                        |
| P4      | 21.5            | 1                  |                                                        |                        | NS                     |                        |                                                            | NS                     |                        |                        |
|         |                 | 18                 | 6.57 × 10 <sup>2</sup>                                 | 2.18 × 10              | 1.21 × 10 <sup>4</sup> | 5.16 × 10 <sup>2</sup> | ND                                                         |                        | ND                     |                        |
| P5      | 22.5            | 1                  | 4.10 × 10 <sup>3</sup>                                 | 8.00 × 10              | 6.54 × 10 <sup>3</sup> | 3.00 × 10              | ND                                                         |                        | ND                     |                        |
|         |                 | 19                 | 3.26 × 10 <sup>3</sup>                                 | 1.09 × 10 <sup>2</sup> | 9.16 × 10 <sup>3</sup> | 3.27 × 10 <sup>2</sup> | ND                                                         |                        | ND                     |                        |
| P6      | 18.8            | 1                  | 3.62 × 10 <sup>3</sup>                                 | 3.05 × 10 <sup>2</sup> | 1.12 × 10 <sup>4</sup> | 2.41 × 10 <sup>2</sup> | ND                                                         |                        | ND                     |                        |
|         |                 | 16                 |                                                        |                        | NS                     |                        |                                                            |                        | NS                     |                        |
| P7      | 12              | 1                  | 4.07 × 10 <sup>4</sup>                                 | 2.18 × 10 <sup>3</sup> | 1.09 × 10 <sup>5</sup> | 4.43 × 10 <sup>3</sup> | ND                                                         |                        | ND                     |                        |
|         |                 | 10                 | 1.02 × 10 <sup>4</sup>                                 | 2.23 × 10 <sup>3</sup> | 8.27 × 10 <sup>3</sup> | 6.77 × 10 <sup>2</sup> | 1.25 × 10 <sup>4</sup>                                     | 3.69 × 10 <sup>2</sup> | 1.41 × 10 <sup>4</sup> | 1.67 × 10 <sup>3</sup> |
| P8      | 5               | 1                  | 2.61 × 10 <sup>3</sup>                                 | 4.72 × 10              | 6.44 × 10 <sup>4</sup> | 3.10 × 10 <sup>3</sup> | ND                                                         |                        | 6.86 × 10 <sup>4</sup> | 8.14 × 10 <sup>3</sup> |
|         |                 | 3.5                | 2.90 × 10 <sup>3</sup>                                 | 2.72 × 10 <sup>2</sup> | 4.95 × 10 <sup>4</sup> | 4.52 × 10 <sup>3</sup> | ND                                                         |                        | ND                     |                        |
| P9      | 8               | 1                  | 1.02 × 10 <sup>3</sup>                                 | 5.51 × 10              | 2.39 × 10 <sup>4</sup> | 1.72 × 10 <sup>3</sup> | 2.04 × 10 <sup>4</sup>                                     | 1.10 × 10 <sup>3</sup> | 3.54 × 10 <sup>4</sup> | 2.54 × 10 <sup>3</sup> |
|         |                 | 6                  | 5.01 × 10 <sup>2</sup>                                 | 2.19 × 10              | 4.54 × 10 <sup>5</sup> | 1.67 × 10 <sup>4</sup> | 1.01 × 10 <sup>4</sup>                                     | 4.42 × 10 <sup>2</sup> | 6.82 × 10 <sup>5</sup> | 2.51 × 10 <sup>4</sup> |
| P10     | 12.9            | 1                  | 1.11 × 10 <sup>3</sup>                                 | 2.75 × 10              | 7.30 × 10 <sup>2</sup> | 2.31 × 10 <sup>2</sup> | 7.20 × 10 <sup>4</sup>                                     | 2.10 × 10 <sup>4</sup> | 2.55 × 10 <sup>4</sup> | 4.63 × 10 <sup>3</sup> |
|         |                 | 11                 | 3.68 × 10 <sup>3</sup>                                 | 1.60 × 10 <sup>2</sup> | 9.48 × 10 <sup>3</sup> | 1.63 × 10 <sup>3</sup> | 1.13 × 10 <sup>5</sup>                                     | 4.92 × 10 <sup>3</sup> | 1.86 × 10 <sup>5</sup> | 3.20 × 10 <sup>4</sup> |
| P11     | 14.2            | 1                  | 0                                                      |                        | 0                      |                        | 1.44 × 10 <sup>4</sup>                                     | 2.52 × 10 <sup>3</sup> | 7.75 × 10 <sup>2</sup> | 8.12 × 10              |
|         |                 | 12                 | 4.71 × 10 <sup>3</sup>                                 | 4.35 × 10 <sup>2</sup> | 1.83 × 10 <sup>4</sup> | 1.14 × 10 <sup>3</sup> | 1.30 × 10 <sup>5</sup>                                     | 6.30 × 10 <sup>3</sup> | 1.37 × 10 <sup>5</sup> | 1.48 × 10 <sup>4</sup> |
| P12     | 16              | 1                  | 7.14 × 10 <sup>2</sup>                                 | 5.22 × 10              | 0                      |                        | 1.21 × 10 <sup>4</sup>                                     | 1.92 × 10 <sup>3</sup> | 4.72 × 10 <sup>3</sup> | 9.84 × 10 <sup>2</sup> |
|         |                 | 14                 | 2.18 × 10 <sup>4</sup>                                 | 1.73 × 10 <sup>3</sup> | 3.30 × 10 <sup>4</sup> | 3.98 × 10 <sup>3</sup> | 3.02 × 10 <sup>5</sup>                                     | 7.81 × 10 <sup>4</sup> | 2.41 × 10 <sup>5</sup> | 4.90 × 10 <sup>3</sup> |

FL, free-living; PA, particle-associated; NS, no sample; ND, not detected (We tried various optimization strategies for qPCR.)
